# Supplementary material for: Intermittent Dosing with Sulindac Provides Effective Colorectal Cancer Chemoprevention in the Azoxymethane-Treated Mouse Model
Source: Oxford University Press journal article supplement (doi:10.1158/1940-6207.capr-17-0038), 2017-06-13
Supplement: 19406207capr170038-sup-178562_2_supp_4089807_tr9tq8.docx [file 19406207capr170038-sup-178562_2_supp_4089807_tr9tq8.docx]

Table S1: Average latency period (time until appearance of first tumor) in weeks for each AOM-treated group.

| **TREATMENT GROUP** | **AVERAGE LATENCY PERIOD (WEEKS)** |
| --- | --- |
| Sulindac-None | 5 |
| Sulindac-2 | 10.43 |
| Sulindac-10 | 11.86 |
| Sulindac-Daily | 15.67 |
